# Supplementary material for: Cost-effectiveness of HIV Prevention Interventions in Sub-Saharan Africa: A Systematic Review
Source: PubMed Central journal article supplement — eClinicalMedicine. 2019 May 20;10:10–31. doi: 10.1016/j.eclinm.2019.04.006 (PMC6543190; doi:10.1016/j.eclinm.2019.04.006), 2019-05-20
Supplement: mmc1.pdf [file mmc1.pdf]

## Search Strategy

### PubMed

| # | Search                                                                                                                                                                                                                                                                           | Results    |
|---|----------------------------------------------------------------------------------------------------------------------------------------------------------------------------------------------------------------------------------------------------------------------------------|------------|
| 1 | "hiv"[MeSH Terms] OR "hiv"[All Fields])                                                                                                                                                                                                                                          | 342384     |
| 2 | ("prevention and control"[Subheading] OR ("prevention"[All Fields] AND "control"[All Fields] OR "prevention and control"[All Fields] OR "prevention"[All Fields])                                                                                                                | 1626511    |
| 3 | ("economics"[Subheading] OR "economics"[All Fields] OR "cost"[All Fields] OR "costs and cost analysis"[MeSH Terms] OR ("costs"[All Fields] AND "cost"[All Fields] AND "analysis"[All Fields]) OR "costs and cost analysis"[All Fields])                                          | 792623     |
| 4 | ("africa south of the sahara"[MeSH Terms] OR ("africa"[All Fields] AND "south"[All Fields] AND "sahara"[All Fields]) OR "africa south of the sahara"[All Fields] OR ("sub"[All Fields] AND "saharan"[All Fields] AND "africa"[All Fields]) OR "sub saharan africa"[All Fields])) | 198736     |
| 5 | Step 1 AND Step 2 AND Step 3 AND Step 4 AND Step 5 AND Step 6                                                                                                                                                                                                                    | 1605       |
| 6 | Step 5 AND ("2009/01/01"[PDAT] : "2018/12/31"[PDAT])                                                                                                                                                                                                                             | <b>863</b> |

### Embase

#### Using Emtree Terms

| # | Search                                                                                                                  | Results   |
|---|-------------------------------------------------------------------------------------------------------------------------|-----------|
| 1 | 'cost benefit analysis'/exp OR 'cost effectiveness analysis'/exp                                                        | 209,286   |
| 2 | 'africa south of the sahara'/exp                                                                                        | 226,059   |
| 3 | 'human immunodeficiency virus'/exp                                                                                      | 181,997   |
| 4 | 'prevention'/exp OR 'prevention and control'/exp                                                                        | 1,339,537 |
| 5 | Step 1 AND Step 2 AND Step 3 AND Step 4                                                                                 | 79        |
| 6 | Step 5 AND (2009:py OR 2010:py OR 2011:py OR 2012:py OR 2013:py OR 2014:py OR 2015:py OR 2016:py OR 2017:py OR 2018:py) | <b>61</b> |

#### Unstructured Terms

| # | Search                                                   | Results   |
|---|----------------------------------------------------------|-----------|
| 1 | 'hiv'/exp OR hiv                                         | 412,390   |
| 2 | 'prevention'/exp OR 'prevention and control'             | 1,831,013 |
| 3 | 'cost effectiveness analysis' OR 'cost benefit analysis' | 211,284   |
| 4 | 'sub-saharan africa' OR 'africa south of the sahara'     | 24,322    |
| 5 | Step 1 AND Step 2 AND Step 3 AND Step 4                  | 79        |

|   |                                                                                                                                     |           |
|---|-------------------------------------------------------------------------------------------------------------------------------------|-----------|
| 6 | hiv AND prevention AND cost effectiveness AND sub Saharan AND africa                                                                | 156       |
| 7 | (Step 5 OR Step 6) AND (2009:py OR 2010:py OR 2011:py OR 2012:py OR 2013:py OR 2014:py OR 2015:py OR 2016:py OR 2017:py OR 2018:py) | <b>54</b> |

### Web of Science

|                                                                                                                                                                                                                                               |            |
|-----------------------------------------------------------------------------------------------------------------------------------------------------------------------------------------------------------------------------------------------|------------|
| (TS=(HIV AND COST AND PREVENTION AND 'sub-Saharan Africa')) AND LANGUAGE: (English) AND DOCUMENT TYPES: (Article)<br><br>Timespan: 2009-2018. Indexes: SCI-EXPANDED, SSCI, A&HCI, CPCI-S, CPCI-SSH, BKCI-S, BKCI-SSH, ESCI, CCR-EXPANDED, IC. | <b>243</b> |
|-----------------------------------------------------------------------------------------------------------------------------------------------------------------------------------------------------------------------------------------------|------------|

### Econ-Lit

|                                                                                                                                   |           |
|-----------------------------------------------------------------------------------------------------------------------------------|-----------|
| (TX HIV AND TX prevention AND TX cost-effectiveness and TX sub-saharan Africa<br><br>Limiters: Published Date: 20090101-20181231. | <b>91</b> |
|-----------------------------------------------------------------------------------------------------------------------------------|-----------|

### African Index Medicus

|                                                    |          |
|----------------------------------------------------|----------|
| HIV AND cost AND prevention AND sub-saharan africa | <b>0</b> |
|----------------------------------------------------|----------|

## **List of Countries Under the UNDP Definition of Sub-Saharan Africa**

Angola  
Benin  
Botswana  
Burkina Faso  
Burundi  
Cameroon  
Cape Verde  
Central African Republic  
Chad  
Comoros  
DRC  
Republic of Congo  
Cote d'Ivoire  
Equatorial Guinea  
Eritrea  
Ethiopia  
Gabon  
Gambia  
Ghana  
Guinea  
Guinea-Bissau  
Kenya  
Lesotho  
Liberia  
Madagascar  
Malawi  
Mali  
Mauritania  
Mauritius  
Mozambique  
Namibia  
Niger  
Nigeria  
Rwanda  
Sao Tome and Principe  
Senegal  
Seychelles  
Sierra Leone  
South Africa  
South Sudan  
Swaziland  
Tanzania

Togo  
Uganda  
Zambia  
Zimbabwe

## S2. PRISMA 2009 Checklist

| Section/topic             | #  | Checklist item                                                                                                                                                                                                                                                                                              | Reported on page # |
|---------------------------|----|-------------------------------------------------------------------------------------------------------------------------------------------------------------------------------------------------------------------------------------------------------------------------------------------------------------|--------------------|
| <b>TITLE</b>              |    |                                                                                                                                                                                                                                                                                                             |                    |
| Title                     | 1  | Identify the report as a systematic review, meta-analysis, or both.                                                                                                                                                                                                                                         | Pg 1               |
| <b>ABSTRACT</b>           |    |                                                                                                                                                                                                                                                                                                             |                    |
| Structured summary        | 2  | Provide a structured summary including, as applicable: background; objectives; data sources; study eligibility criteria, participants, and interventions; study appraisal and synthesis methods; results; limitations; conclusions and implications of key findings; systematic review registration number. | Pg 1               |
| <b>INTRODUCTION</b>       |    |                                                                                                                                                                                                                                                                                                             |                    |
| Rationale                 | 3  | Describe the rationale for the review in the context of what is already known.                                                                                                                                                                                                                              | Pg 2               |
| Objectives                | 4  | Provide an explicit statement of questions being addressed with reference to participants, interventions, comparisons, outcomes, and study design (PICOS).                                                                                                                                                  | Pg 3               |
| <b>METHODS</b>            |    |                                                                                                                                                                                                                                                                                                             |                    |
| Protocol and registration | 5  | Indicate if a review protocol exists, if and where it can be accessed (e.g., Web address), and, if available, provide registration information including registration number.                                                                                                                               | Pg 3               |
| Eligibility criteria      | 6  | Specify study characteristics (e.g., PICOS, length of follow-up) and report characteristics (e.g., years considered, language, publication status) used as criteria for eligibility, giving rationale.                                                                                                      | Pg 3               |
| Information sources       | 7  | Describe all information sources (e.g., databases with dates of coverage, contact with study authors to identify additional studies) in the search and date last searched.                                                                                                                                  | Pg 3               |
| Search                    | 8  | Present full electronic search strategy for at least one database, including any limits used, such that it could be repeated.                                                                                                                                                                               | S1                 |
| Study selection           | 9  | State the process for selecting studies (i.e., screening, eligibility, included in systematic review, and, if applicable, included in the meta-analysis).                                                                                                                                                   | Pg 3               |
| Data collection process   | 10 | Describe method of data extraction from reports (e.g., piloted forms, independently, in duplicate) and any processes for obtaining and confirming data from investigators.                                                                                                                                  | Pg 3               |
| Data items                | 11 | List and define all variables for which data were sought (e.g., PICOS, funding sources) and any assumptions and simplifications made.                                                                                                                                                                       | Pg 3-4             |

|                                    |    |                                                                                                                                                                                                                        |                        |
|------------------------------------|----|------------------------------------------------------------------------------------------------------------------------------------------------------------------------------------------------------------------------|------------------------|
| Risk of bias in individual studies | 12 | Describe methods used for assessing risk of bias of individual studies (including specification of whether this was done at the study or outcome level), and how this information is to be used in any data synthesis. | CHEERS checklist; pg 3 |
| Summary measures                   | 13 | State the principal summary measures (e.g., risk ratio, difference in means).                                                                                                                                          | Pg 4                   |
| Synthesis of results               | 14 | Describe the methods of handling data and combining results of studies, if done, including measures of consistency (e.g., $I^2$ ) for each meta-analysis.                                                              | N/A for sys review     |

### S3. Consolidated Health Economic Evaluation Reporting Standards (CHEERS) checklist

We used the CHEERS checklist to assess the quality of the studies included in this review. Table 2 illustrates the results of the quality assessment. The following information details the CHEERS recommendations with the corresponding numbers found in Table 2.

More information about the CHEERS checklist can be found at the following link: <http://www.ispor.org/TaskForces/EconomicPubGuidelines.asp>

| Section                         | Item No | Recommendation                                                                                                                                                                             |
|---------------------------------|---------|--------------------------------------------------------------------------------------------------------------------------------------------------------------------------------------------|
| <b>Title and Abstract</b>       |         |                                                                                                                                                                                            |
| Title                           | 1       | Identify the study as an economic evaluation or use more specific terms such as “cost-effectiveness analysis”, and describe the interventions compared.                                    |
| Abstract                        | 2       | Provide a structured summary of objectives, perspective, setting, methods (including study design and inputs), results (including base case and uncertainty analyses), and conclusions.    |
| <b>Introduction</b>             |         |                                                                                                                                                                                            |
| Background and objectives       | 3       | Provide an explicit statement of the broader context for the study.<br>Present the study question and its relevance for health policy or practice decisions.                               |
| <b>Methods</b>                  |         |                                                                                                                                                                                            |
| Target population and subgroups | 4       | Describe characteristics of the base case population and subgroups analysed, including why they were chosen.                                                                               |
| Setting and location            | 5       | State relevant aspects of the system(s) in which the decision(s) need(s) to be made.                                                                                                       |
| Study perspective               | 6       | Describe the perspective of the study and relate this to the costs being evaluated.                                                                                                        |
| Comparators                     | 7       | Describe the interventions or strategies being compared and state why they were chosen.                                                                                                    |
| Time horizon                    | 8       | State the time horizon(s) over which costs and consequences are being evaluated and say why appropriate.                                                                                   |
| Discount rate                   | 9       | Report the choice of discount rate(s) used for costs and outcomes and say why appropriate.                                                                                                 |
| Choice of health outcomes       | 10      | Describe what outcomes were used as the measure(s) of benefit in the evaluation and their relevance for the type of analysis performed.                                                    |
| Measurement of effectiveness    | 11a     | <i>Single study-based estimates:</i> Describe fully the design features of the single effectiveness study and why the single study was a sufficient source of clinical effectiveness data. |

|                                                        |     |                                                                                                                                                                                                                                                                                                                                                       |
|--------------------------------------------------------|-----|-------------------------------------------------------------------------------------------------------------------------------------------------------------------------------------------------------------------------------------------------------------------------------------------------------------------------------------------------------|
|                                                        | 11b | <i>Synthesis-based estimates</i> : Describe fully the methods used for identification of included studies and synthesis of clinical effectiveness data.                                                                                                                                                                                               |
| Measurement and valuation of preference based outcomes | 12  | If applicable, describe the population and methods used to elicit preferences for outcomes.                                                                                                                                                                                                                                                           |
| Estimating resources and costs                         | 13a | <i>Single study-based economic evaluation</i> : Describe approaches used to estimate resource use associated with the alternative interventions. Describe primary or secondary research methods for valuing each resource item in terms of its unit cost. Describe any adjustments made to approximate to opportunity costs.                          |
|                                                        | 13b | <i>Model-based economic evaluation</i> : Describe approaches and data sources used to estimate resource use associated with model health states. Describe primary or secondary research methods for valuing each resource item in terms of its unit cost. Describe any adjustments made to approximate to opportunity costs.                          |
| Currency, price date, and conversion                   | 14  | Report the dates of the estimated resource quantities and unit costs. Describe methods for adjusting estimated unit costs to the year of reported costs if necessary. Describe methods for converting costs into a common currency base and the exchange rate.                                                                                        |
| Choice of model                                        | 15  | Describe and give reasons for the specific type of decision-analytical model used. Providing a figure to show model structure is strongly recommended.                                                                                                                                                                                                |
| Assumptions                                            | 16  | Describe all structural or other assumptions underpinning the decision-analytical model.                                                                                                                                                                                                                                                              |
| Analytical methods                                     | 17  | Describe all analytical methods supporting the evaluation. This could include methods for dealing with skewed, missing, or censored data; extrapolation methods; methods for pooling data; approaches to validate or make adjustments (such as half cycle corrections) to a model; and methods for handling population heterogeneity and uncertainty. |
| <b>Results</b>                                         |     |                                                                                                                                                                                                                                                                                                                                                       |
| Study parameters                                       | 18  | Report the values, ranges, references, and, if used, probability distributions for all parameters. Report reasons or sources for distributions used to represent uncertainty where appropriate. Providing a table to show the input values is strongly recommended.                                                                                   |
| Incremental costs and outcomes                         | 19  | For each intervention, report mean values for the main categories of estimated costs and outcomes of interest, as well as mean differences between the comparator groups. If applicable, report incremental cost-effectiveness ratios.                                                                                                                |
| Characterizing uncertainty                             | 20a | <i>Single study-based economic evaluation</i> : Describe the effects of sampling uncertainty for the estimated incremental cost and incremental effectiveness parameters, together with the impact of methodological assumptions (such as discount rate, study perspective).                                                                          |
|                                                        | 20b | <i>Model-based economic evaluation</i> : Describe the effects on the results of uncertainty for all input parameters, and uncertainty related to the structure of the model and assumptions.                                                                                                                                                          |



|                                                                      |    |                                                                                                                                                                                                                                                                            |
|----------------------------------------------------------------------|----|----------------------------------------------------------------------------------------------------------------------------------------------------------------------------------------------------------------------------------------------------------------------------|
| Characterizing heterogeneity                                         | 21 | If applicable, report differences in costs, outcomes, or cost-effectiveness that can be explained by variations between subgroups of patients with different baseline characteristics or other observed variability in effects that are not reducible by more information. |
| <b>Discussion</b>                                                    |    |                                                                                                                                                                                                                                                                            |
| Study findings, limitations, generalizability, and current knowledge | 22 | Summarise key study findings and describe how they support the conclusions reached. Discuss limitations and the generalisability of the findings and how the findings fit with current knowledge.                                                                          |
| <b>Other</b>                                                         |    |                                                                                                                                                                                                                                                                            |
| Source of funding                                                    | 23 | Describe how the study was funded and the role of the funder in the identification, design, conduct, and reporting of the analysis. Describe other non-monetary sources of support.                                                                                        |
| Conflicts of interest                                                | 24 | Describe any potential for conflict of interest of study contributors in accordance with journal policy. In the absence of a journal policy, we recommend authors comply with International Committee of Medical Journal Editors recommendations.                          |
